# Supplementary material
Source: publisher site journal article supplement (https://www.dovepress.com/article/298105)
Supplement: Supplementary file 1 [file get_supplementary_file.php]

Supplemental figure: the images of tri-lineage differentiation from ref. 15.

### Tri-lineage differentiation of ADMSCs

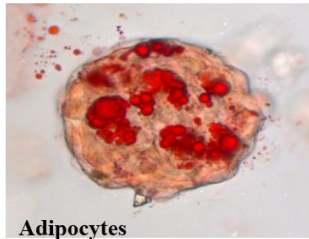

Adipocytes

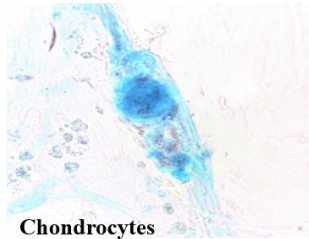

Chondrocytes

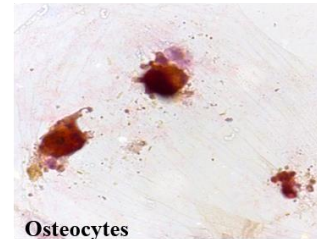

Osteocytes

*Ma H et al. Cell Transplant. 2019;28(7):874-884.*
